# Supplementary material for: Structure and stability of the complex formed by oligonucleotides
Source: Royal Society of Chemistry journal article supplement (doi:10.1039/c2cp24086f), 2012-01-01
Supplement: c2cp24086f.pdf [file c2cp24086f.pdf]

Cite this: DOI: 10.1039/c0xx00000x

www.rsc.org/xxxxxx

ARTICLE TYPE

Supporting Information for

# Structure and stability of the complex formed by oligonucleotides

Cui Zheng,<sup>a</sup> Lin Niu,<sup>a</sup> Jingjing Yan,<sup>a</sup> Jie Liu,<sup>b</sup> Ying Luo<sup>b</sup> and Dehai Liang<sup>\*a</sup>

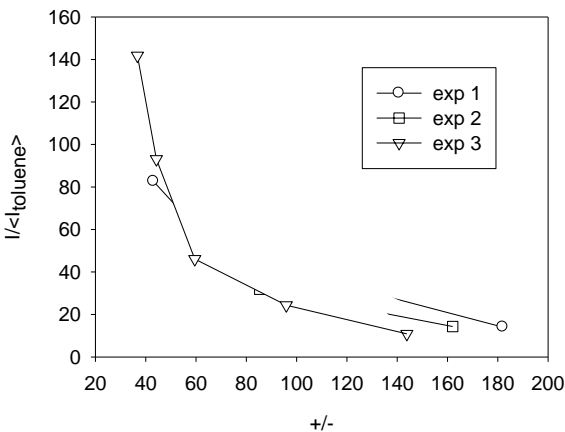

**Fig. S1** Scattered intensity of DNA complex by adding salmon testes dsDNA to PLL. The experiment is repeated three times.
